# Supplementary material for: Magnetite-Arginine Nanoparticles as a Multifunctional Biomedical Tool
Source: PubMed Central journal article supplement (PMC7600042; doi:10.3390/nano10102014), 2020-10-13
Supplement: nanomaterials-10-02014-s001.pdf [file nanomaterials-10-02014-s001.pdf]

Supporting Information

## Magnetite-Arginine Nanoparticles as a Multifunctional Biomedical Tool

Victoria E. Reichel <sup>1,2</sup>, Jasmin Matuszak <sup>3,4</sup>, Klaas Bente <sup>1,5</sup>, Tobias Heil <sup>1</sup>, Alexander Kraupner <sup>6</sup>, Silvio Dutz <sup>7</sup>, Iwona Cicha <sup>3</sup> and Damien Faivre <sup>1,8,\*</sup>

- <sup>1</sup> Max Planck Institute of Colloids and Interfaces, Department of Biomaterials, Am Mühlenberg 1, 14476 Potsdam, Germany; victoria.reichel@univ-paris-diderot.fr (V.E.R.); klaas.bente@bam.de (K.B.); tobias.heil@mpikg.mpg.de (T.H.)
  - <sup>2</sup> Laboratoire “Matière et Systèmes Complexes” (MSC), UMR 7057 CNRS, Université Paris 7 Diderot, 75205 Paris Cedex 13, France
  - <sup>3</sup> Section of Experimental Oncology and Nanomedicine (SEON), ENT Department, University Hospital Erlangen, Friedrich-Alexander-Universität Erlangen-Nürnberg, Glückstraße 10a, 91054 Erlangen, Germany; jasmin.matuszak@charite.de (J.M.); iwona.cicha@uk-erlangen.de (I.C.)
  - <sup>4</sup> Department of Anesthesiology, Kurume University Hospital, Cognitive and Molecular Research Institute of Brain Diseases, Kurume University, 65-1, Asahimachi, Kurume 830-0011, Japan
  - <sup>5</sup> Bundesanstalt für Materialforschung und -prüfung, Unter den Eichen 87, 12205 Berlin, Germany
  - <sup>6</sup> nanoPET Pharma GmbH, Luisencarrée Robert-Koch-Platz 4, 10115 Berlin, Germany; alexander.kraupner@nanopet.de
  - <sup>7</sup> Institute of Biomedical Engineering and Informatics, Technische Universität Ilmenau, PF 100565, 98684 Ilmenau, Germany; Silvio.Dutz@tu-ilmenau.de
  - <sup>8</sup> Aix-Marseille Université, CEA, CNRS, BIAM, 13108 Saint Paul lez Durance, France
- \* Correspondence: damien.faivre@cea.fr

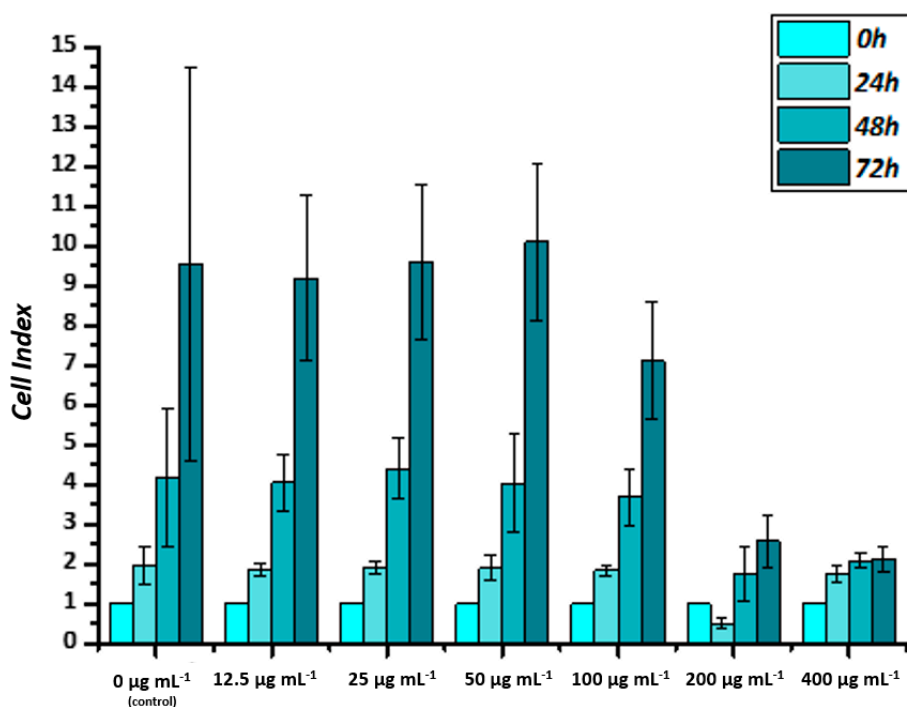

**Figure S1.** Biological effects of Resovist® particles on endothelial cells grown in static conditions by real-time cell analysis. HUVECs were seeded 24 h before nanoparticle application. After these initial 24 h, particles in different concentrations were added and cell index was monitored up to 72 h post application. Cell Index is displayed as x-fold of untreated controls. Data are expressed as mean ± SEM of n = 3 experiments.

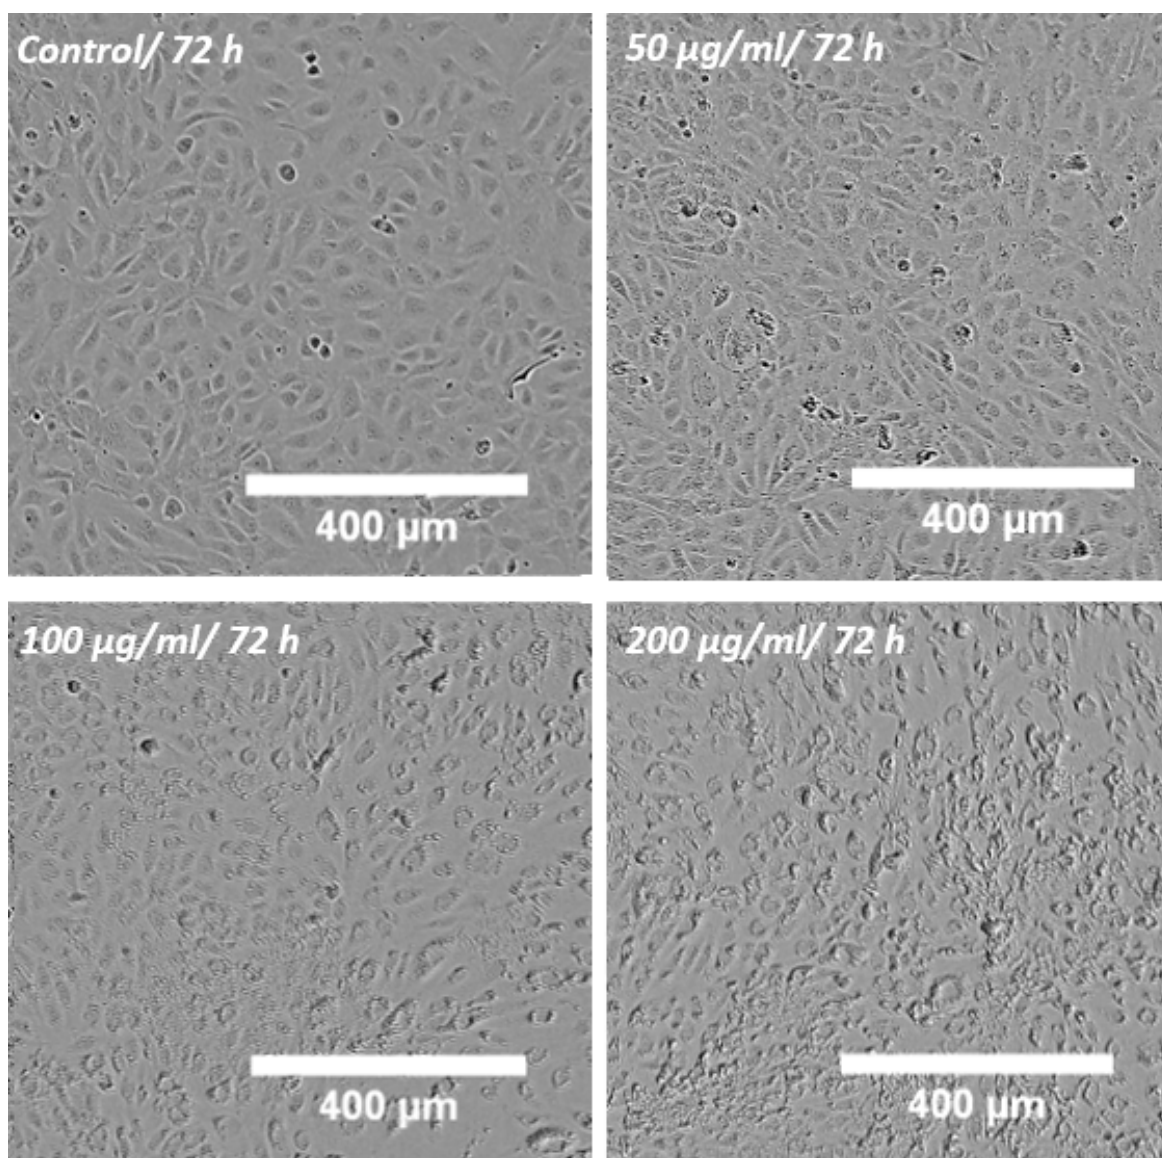

**Figure S2.** Live-cell microscopy of HUVECs treated with Resovist® particles: Phase contrast images of HUVECs were taken after 72 h post particle addition. (a) Untreated control HUVECs, (b) HUVECs treated with  $50 \mu\text{g mL}^{-1}$ , (c) HUVECs treated with  $100 \mu\text{g mL}^{-1}$  and (d) HUVECs treated with  $200 \mu\text{g mL}^{-1}$  Resovist® particles.

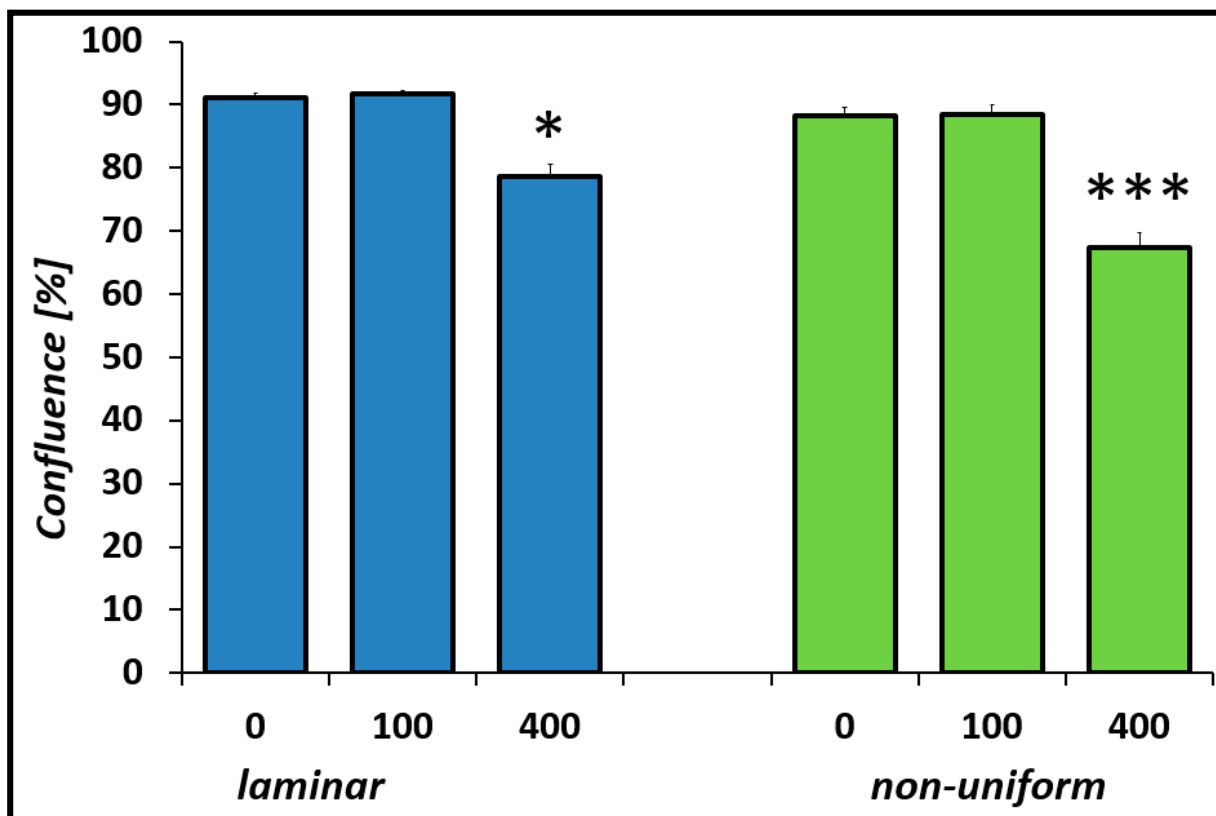

**Figure S3.** The graphs show the semi-quantitative analysis of confluence in non-uniform (green) and laminar (blue) region of the bifurcating channels according to the fluorescent images shown in Figure 4. The analysis was done using ImageJ software. n=3, Data are expressed as mean  $\pm$  SEM, \*p<0.05, \*\*p<0.01, \*\*\*p<0.001 vs. corresponding control (one-way Anova).
